# Supplementary material
Source: Springer Nature journal article supplement (https://www.springermedizin.de/resource/supplementary/12877_2012_822_MOESM1_ESM.pdf/9440394)

Dementia  
crisis process

**Evaluation**

Homeostasis  
achieved

**Immediate decision**

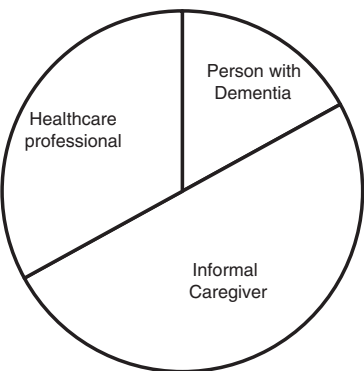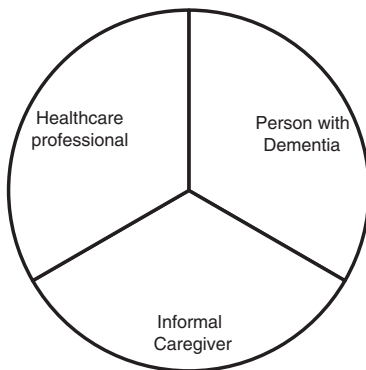

**Stressors**

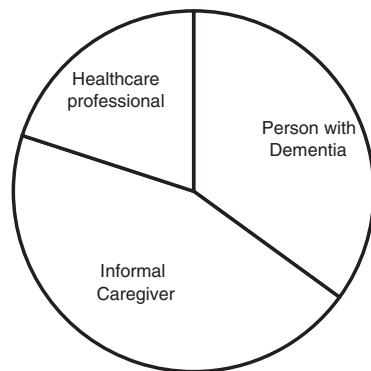

**Imbalance**

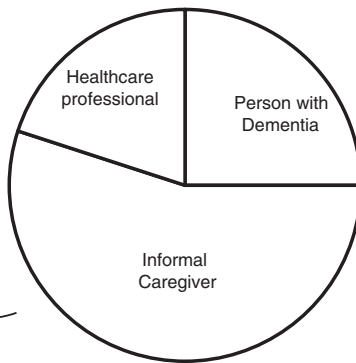

*Homeostasis  
unstable*

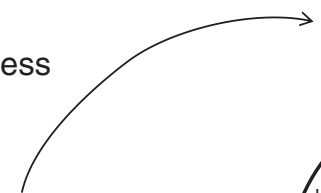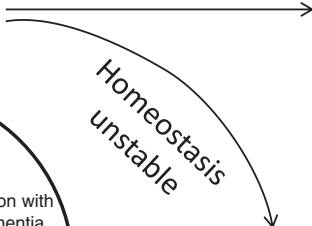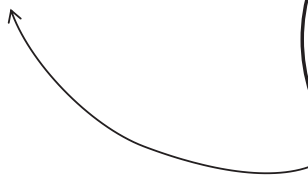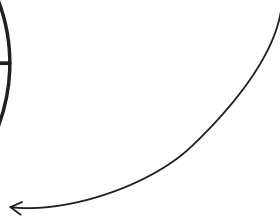

Supplement: MOESM1 [file 9440394]
